# Supplementary material for: Aerobic Exercise on Functional Capacity and Quality of Life in COPD Patients: A systematic review and meta-analysis with trial sequential analysis
Source: Research Square preprint supplement (doi:10.21203/rs.3.rs-8126313/v1), 2025-12-12
Supplement: Supplementary file 1 [file b0ece27e4c6e5d6ae64288f4.docx]

| First author,  year | Country,  study design | Mean Age (years) mean±SD | | Sample size | | Mean FEV1 %predicted AG/CG | Intervention | | Intervention Details | Outcome | Treatment  duration |
| --- | --- | --- | --- | --- | --- | --- | --- | --- | --- | --- | --- |
| AG | CG | AG | CG | AG | CG |
| Abedi, [27] 2019 | Iran, RCT | 53.5 ± 10.37 | 55.67 ± 11.08 | 14 | 15 | NR | outpatient-based program including aerobic exercise, 2 days/wk | usual care control | 40 min of aerobic exercise was performed on a treadmill and a foot ergometer two days a week with 40-60% of heart rate reserve | SGRQ | 8wk |
| Borghi-Silva,[28] 2009 | the United States of America, RCT | 67 ± 10 | 67 ± 10 | 20 | 14 | 33/35 | outpatient-based program including usual medical care, aerobic exercise, 3 days/wk | usual care control | 50 min of aerobic exercise (20 min of stretching of lower and upper limbs and 30 min of treadmill ambulation) The training intensity on treadmill was set at 70% of the maximal speed achieved during the symptom limited exercise test | 6MWD, FVC (%predicted), FEV1 (%predicted). | 6wk |
| BrunaGS, [37] 2024 | Brazil, 2024 | 65.5±6.3 | 66.3±10.2 | 11 | 11 | 44.6±23.2/ 46.0±26.5 | a water aerobic exercise program | evaluations | 60 min of aerobic exercise, on alternate days, three times a week for eight weeks, totaling 24 sessions | FVC (%predicted), FEV1 (%predicted)，FEV1/FVC (%), 6MWD. | 8wk |
| Chang N，[29] 2023 | China, RCT | 70.242±8.3980 | 69.183±9.0873 | 20 | 20 | NR | Aerobic exercise combined  with drug care group | regular drug treatment only. | 60 min of aerobic exercise daily. | 6MWD. | 8wk |
| Chen X, [30] 2020 | China, RCT | 83.48 ± 5.21 | 83.80 ± 4.98 | 25 | 25 | 48.16/48.92 | outpatient-based program including usual medical care and aerobic exercise,  3-4 days/wk | usual care control | 30 min of aerobic exercise (treadmill training and upper extremity power car training) AT level heart rate ±5 beats /min | FEV1 (%predicted), FEV1/FVC(%), 6MWD,  CAT | 16wk |
| Chen X, [31] 2025 | China, RCT | Baduanjin Group: 66.7 ± 6.7 | 66.7 ± 8.1 | 55 | 53 | 46.45 ± 20.97/ 46.77 ± 13.64 | Baduanjin Group: Baduanjin Exercise； | routine healthcare services but no specific PR or exercise training. | 30 min of aerobic exercise (Baduanjin) : an intensive, therapist-led, and nurse-assist training program 5 sessions week 1；30-minute sessions, twice daily, for 5 days per week. 12-week | FEV1 (%predicted), 6MWD, CAT, SGRQ. | 12wk |
| Chen Y, [32] 2024 | China, RCT | BE：61.52 ± 10.31 | 61.97 ± 10.91 | 158 | 160 | NR | The Baduanjin group received six months of Baduanjin training, | usual care | 30 min of aerobic exercise (Baduanjin training) at home from the second to the sixth month. 5 days a week, twice a day. | CAT, 6MWD. | 24wk |
| Chen ZY, [33] 2025 | China, RCT | 69.03±1.05 | 67.10±1.20 | 32 | 31 | 45.30±11.74/51.14±17.44 | Traditional Chinese exercise (TCE) + medication and usual nursing care | Medication and usual nursing care | 35 min of aerobic exercise (lung-strengthening exercise) once a week at the hospital and 3 times a week at home, with each session. | FVC (%predicted), FEV1 (%predicted), FEV1/FVC(%),6MWD、CAT. | 12 wk |
| Deng L, [34] 2020 | China, RCT | 76.53 ± 8.59 | 76.59 ± 7.69 | 30 | 32 | 57.66/54.24 | outpatient-based program including usual medical care, nursing prevention and aerobic exercise,  5-7 days/wk | usual care control | 30 min of aerobic exercise (liuzijue) Heart rate, less than 60% of the patient's maximum expected heart rate (220 -- age) | FEV1 (%predicted),  FEV1/FVC (%), CAT | 12wk |
| Finnerty, [35]2001 | United Kingdom, RCT | 70.4 ± 8.0 | 68.4 ± 10.4 | 32 | 23 | 41.2/41.2 | outpatient-based program including educational sessions, 2 days/wk aerobic exercise, once or twice daily， minimum of 5 days/wk, 1-2 time/d  dietary assessment and advice, 1 days/wk | usual care control | 25 min of aerobic activity （diagonal arm raises, arm abduction into elevation and reverse, and arm abduc tion, forward flexion, and reverse; treadmill or static bicycle exercise; step-ups with three step heights; and straight leg raises） | FEV1 (%predicted), FVC (%predicted), SGRQ，6MWD | 6wk |
| Gallo-Silva, [36] 2019 | Brazil, RCT | 66.3 ± 6.5 | 66.5 ± 9.5 | 10 | 9 | 47.9/47.8 | supervised program including usual medical care and water-based aerobic interval  training, 3 days/wk | usual care control | 20-40 min aerobic exercises including exercises for the trunk, upper limbs, and lower limbs that involved the hips, feet, ankles, hands/wrists, and shoulders. prescribed intensity, Borg CR-10 scale rating of 4 to 6 | FVC (%predicted), FEV1 (%predicted), SGRQ,6MWD | 8wk |
| Gu J, [38] 2018 | China, RCT | NR (Non Reported) | NR (Non Reported) | 20 | 20 | NR | outpatient-based program including usual medical care, educational sessions and aerobic exercise | usual care control | NR | 6MWD | 12wk |
| Huang X, [39] 2021 | China, RCT | 67.4 ± 6.8 | 67.4 ± 6.8 | 29 | 30 | NR | outpatient-based program including usual medical care, educational sessions and aerobic exercise, 5 days/wk | usual care control | 30-45 min of aerobic exercise (Pedal the power cycling) | SGRQ, 6MWD | 12wk |
| Liu SY, [40] 2024 | China, RCT | 59.59±3.81 | 59.52±3.79 | 60 | 60 | NR | lung rehabilitation nursing plan. | routine  nursing | 30 min of aerobic exercise, 3 times/week; | 6MWD. | NR |
| Liu Y, [41] 2022 | China, RCT | 67.57 ± 4.34 | 67.34 ± 4.22 | 59 | 58 | 52.62/52.55 | outpatient-based program including aerobic exercise,  3 days/wk | active control | 45 min of aerobic exercise (jogging, squats, aerobics, etc) The initial training intensity was 50% ~ 70% of the maximum intensity in CPET test | FEV1 (%predicted),FEV1/FVC(%),6MWD, CAT | 8wk |
| Lu DD, [42] 2022 | China, RCT | 62.79 ± 7.08 | 63.47 ± 7.13 | 52 | 52 | 48.02/47.38 | outpatient-based program including nursing counselling session, usual care and aerobic exercise, 3-5 days/wk | active control | 20-30 min of aerobic exercise (playing badminton, shuttlecock kicking, swimming, slow running, climbing buildings, cycling or square dancing, etc), exercise heart rate anaerobic threshold (AT) level ±5 beats /min | FEV1 (%predicted), FEV1/FVC(%),CAT | 8wk |
| Shen H, [43] 2023 | China, RCT | 60.57 ± 6.46 | 58.88 ± 5.58 | 45 | 45 | NR | Aerobic exercise guided by CPET target heart rate | respiratory training based on the target heart rate in the cardiopulmonary  exercise test | 30–45 min of aerobic exercise (Routine care + aerobic exercise), 5 times/week, 12 weeks); | FEV1/FVC (%), 6MWD, CAT, SGRQ | 12wk |
| Shen HH, [44] 2024 | China, RCT | 62.0 ± 7.1 | 62.7 ± 7.5 | 27 | 30 | 44.6± 8.4/ 44.9 ± 8.3 | airway pressure therapy +moderate-intensity aerobic exercise | airway pressure therapy | 40 min of moderate-intensity aerobic exercise, 5 times per week, 20wk. | 6MWD, FEV1 (%predicted). | 20wk |
| Tang SX, [45] 2018 | China, RCT | 61.3 ± 8.5 | 61.5 ± 8.2 | 43 | 43 | 51.7/51.6 | outpatient-based program including usual care and aerobic exercise, 4-5 days/wk | usual care control | 20-30 min of aerobic exercise (walking), pulse at 120 beats /min | FEV1/FVC (%), 6MWD, SGRQ | 24wk |
| Wang QY, [46] 2024 | China, RCT | 65y and above | 65y and above | 50 | 50 | NR | Respiratory rehabilitation care+ regular drug treatment+nursing | regular drug treatment+nursing | NR. | SGRQ，CAT. | 24wk |
| Wang Y, [47] 2022 | China, RCT | 66.87 ± 4.82 | 66.45 ± 4.71 | 63 | 63 | 50.12/50.38 | outpatient-based program including aerobic exercise,  7 days/wk | active control | 40 min of aerobic exercise (jogging, aerobics, Tai chi, squat, brisk walking and so on) | FEV1 (%predicted)，6MWD, CAT | 8wk |
| Xu Y, [48] 2017 | China, RCT | 67 ± 11. 8 | 68 ± 10. 4 | 54 | 54 | 57.86/58.11 | outpatient-based program including educational sessions, routine respiratory function training and aerobic exercise, 5 days/wk | active control | 45 min of aerobic exercise (treadmill and walking training) Heart rate < 70% Max heart rate (Max heart rate = 220 - age) | FEV1/FVC (%), 6MWD, | 4wk |
| Yu ZH, [49] 2024 | China, RCT | 68.3 ± 4.3 | 69.6 ± 4.8 | 35 | 37 | NR | |  | | --- |   Postoperative exercise training | standard postoperative rehabilitation for 1 wk. After that, oxygen therapy (if needed) and nebulization | 30 min of aerobic exercise (cycle ergometer)24 training sessions, twice daily, 6 days a week | 6MWD. | 2wk |
| Zhu WH, [50] 2024 | China, RCT | 61.28±7.14 | 60.22±7.26 | 55 | 55 | NR | Pulmonary rehabilitation+ Budesonide formoterol inhalation powder spray | Budesonide formoterol inhalation powder spray | Aerobic exercise: heart rate reaches 60%~70% of the maximum expected heart rate. | FEV₁/FVC (%)，6MWD，SGRQ. | 30d |
| Zhu ZG, [51] 2025 | China, RCT | 65.3 ± 3.9 | 64.6 ± 3.9 | 27 | 27 | 71.22±11.27/71.22±10.67 | The Mawangdui group practised the Mawangdui exercise | daily activities without additional exercise | 60 min of aerobic exercise (Mawangdui exercise) 12-week, five days a week. | FEV1 (%predicted), 6MWD, SGRQand CAT. | 12wk |

SD: standard deviation; RCT: randomized controlled trials; AG: aerobic group; CG: control group; FEV1: forced expiratory volume in one second; NR: non reported; SGRQ: St. George's Respiratory Questionnaire; 6MWT: six minutes walk test; FEV1/FVC: Forced Expiratory Volume in 1 Second/Forced Vital Capacity; CAT: COPD Assessment Test
