# Supplementary material for: Aerobic Exercise on Functional Capacity and Quality of Life in COPD Patients: A systematic review and meta-analysis with trial sequential analysis
Source: Research Square preprint supplement (doi:10.21203/rs.3.rs-8126313/v1), 2025-12-12
Supplement: Supplementary file 2 [file d3b1810d663327d6498e3d92.docx]

**SUPPLEMENTARY INFORMATION**

**Aerobic Exercise on Functional Capacity and Quality of Life in COPD Patients: a meta-analysis of randomized controlled trials**

**CONTENTS**

**[Appendix 1: Search strategies](#_Toc210652667)** [3](#_Toc210652667)

**[1.1 PubMed](#_Toc210652668)** [3](#_Toc210652668)

**[1.2 Cochrane Central Register of Controlled Trials](#_Toc210652669)** [3](#_Toc210652669)

**[1.3 Embase](#_Toc210652670)** [3](#_Toc210652670)

**[1.4 Web of science](#_Toc210652671)** [4](#_Toc210652671)

**[1.5 EBSCO](#_Toc210652672)** [4](#_Toc210652672)

**[1.6 Clinical trials](#_Toc210652673)** [4](#_Toc210652673)

**[1.7 China National Knowledge Information Database (CNKI), China Science and Technology Journal Database (CSTJ), WanFang Database](#_Toc210652674)** [5](#_Toc210652674)

**[Appendix 2: Subgroup analysis](#_Toc210652675)** [6](#_Toc210652675)

**[2.1 Subgroup analysis based on average age](#_Toc210652676)** [6](#_Toc210652676)

**[2.1.1 6MWT](#_Toc210652677)** [6](#_Toc210652677)

**[2.1.2 CAT](#_Toc210652678)** [6](#_Toc210652678)

**[2.1.3 SGRQ](#_Toc210652679)** [7](#_Toc210652679)

**[2.1.4 FEV1% pred](#_Toc210652680)** [7](#_Toc210652680)

**[2.1.5 FEV1/FVC%](#_Toc210652681)** [8](#_Toc210652681)

**[2.2 Subgroup analysis based on different interventions of the aerobic group](#_Toc210652682)** [9](#_Toc210652682)

**[2.2.1 6MWT](#_Toc210652683)** [9](#_Toc210652683)

**[2.2.2 CAT](#_Toc210652684)** [9](#_Toc210652684)

**[2.2.3 SGRQ](#_Toc210652685)** [10](#_Toc210652685)

**[2.2.4 FEV1% pred](#_Toc210652686)** [10](#_Toc210652686)

**[2.2.5 FEV1/FVC%](#_Toc210652687)** [11](#_Toc210652687)

**[Appendix 3: Meta Regression](#_Toc210652688)** [12](#_Toc210652688)

**[Appendix 4: Sensitivity analysis](#_Toc210652689)** [13](#_Toc210652689)

**[4.1 6MWT](#_Toc210652690)** [13](#_Toc210652690)

**[4.2 CAT](#_Toc210652691)** [13](#_Toc210652691)

**[4.3 SGRQ](#_Toc210652692)** [14](#_Toc210652692)

**[4.4 FEV1% pred](#_Toc210652693)** [14](#_Toc210652693)

**[4.5 FEV1/FVC%](#_Toc210652694)** [15](#_Toc210652694)

**[Appendix 5: Publication bias](#_Toc210652695)** [16](#_Toc210652695)

**[5.1 the Egger's test result of 6MWT](#_Toc210652696)** [16](#_Toc210652696)

**[5.2 the funnel plot of 6MWT](#_Toc210652697)** [16](#_Toc210652697)

**[5.3 6MWT's shear compensation funnel chart](#_Toc210652698)** [17](#_Toc210652698)

**Appendix 1: Search strategies**

- 1. **PubMed**

#1 ((exercise[MeSH Terms]) OR (aerobic exercise[Title/Abstract])) OR (pulmonary rehabilitation[Title/Abstract])

#2 ((Pulmonary Disease, Chronic Obstructive[MeSH Terms]) OR (COPD[Title/Abstract])) OR (Chronic Obstructive Pulmonary Disease[Title/Abstract])

#1 AND #2

- 1. **Cochrane Central Register of Controlled Trials**

#1 MeSH descriptor: [Exercise] explode all trees

#2 ("aerobic exercise" OR "pulmonary rehabilitation"):ti,ab,kw

#3 #1 OR #2

#4 MeSH descriptor: [Pulmonary Disease, Chronic Obstructive] explode all trees

#5 (COPD OR "Chronic Obstructive Pulmonary Disease"):ti,ab,kw

#6 #4 OR #5

#7 #3 AND #6

- 1. **Embase**

#1 copd:ti,ab,kw OR 'chronic obstructive pulmonary disease':ti,ab,kw

#2 'chronic obstructive lung disease'/exp

#3 #1 OR #2

#4 'pulmonary rehabilitation'/exp

#5 'aerobic exercise'/exp

#6 #4 OR #5

#7 #3 AND #6

- 1. **Web of science**

#1 “aerobic exercise” OR “pulmonary rehabilitation”

#2 “Pulmonary Disease, Chronic Obstructive” OR COPD OR “Chronic Obstructive Pulmonary Disease”

#3 “Randomized Controlled Trial”

#1 AND #2 AND #3

- 1. **EBSCO**

#1 aerobic exercise OR pulmonary rehabilitation

#2 Pulmonary Disease, Chronic Obstructive OR COPD OR Chronic Obstructive Pulmonary Disease

#3 Randomized Controlled Trial

#1 AND #2 AND #3

- 1. **Clinical trials**

Condition or disease: Chronic Obstructive Pulmonary Disease

Intervention/treatment: aerobic exercise

- 1. **China National Knowledge Information Database (CNKI), China Science and Technology Journal Database (CSTJ), WanFang Database**

#1 aerobic exercise OR pulmonary rehabilitation

#2 Pulmonary Disease, Chronic Obstructive OR COPD OR Chronic Obstructive Pulmonary Disease

#3 Randomized Controlled Trial

#1 AND #2 AND #3

**Appendix 2: Subgroup analysis**

**2.1 Subgroup analysis based on average age**

**2.1.1 6MWT**

**
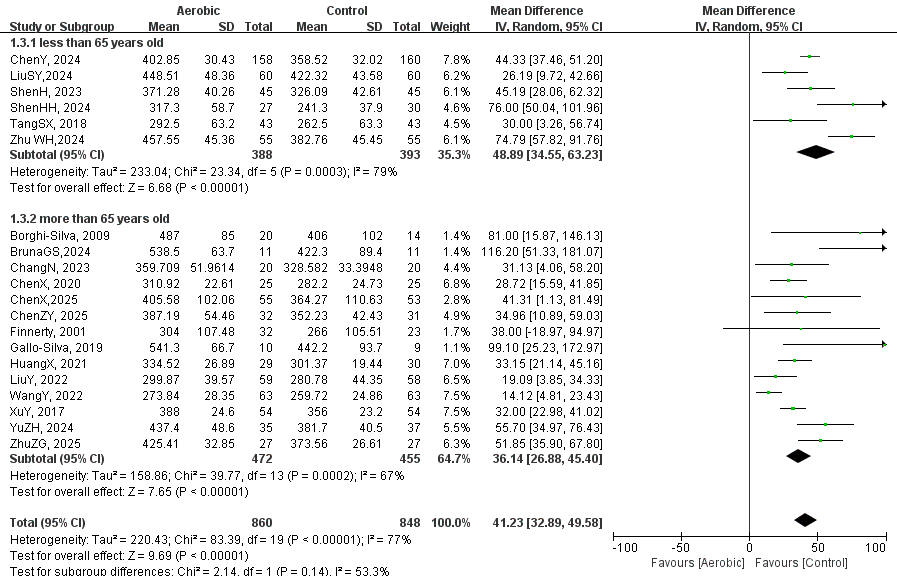
**

**Figure. S1** Subgroup analysis based on average age of 6WMT

**2.1.2 CAT**

**
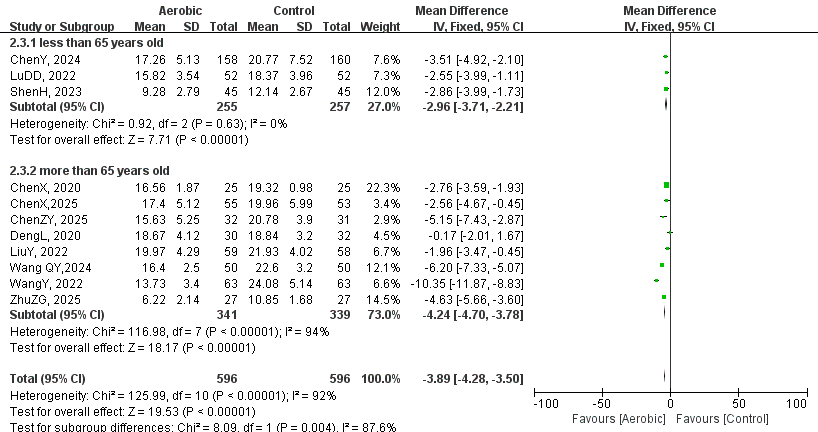
**

**Figure. S2** Subgroup analysis based on average age of CAT

**2.1.3 SGRQ**

**
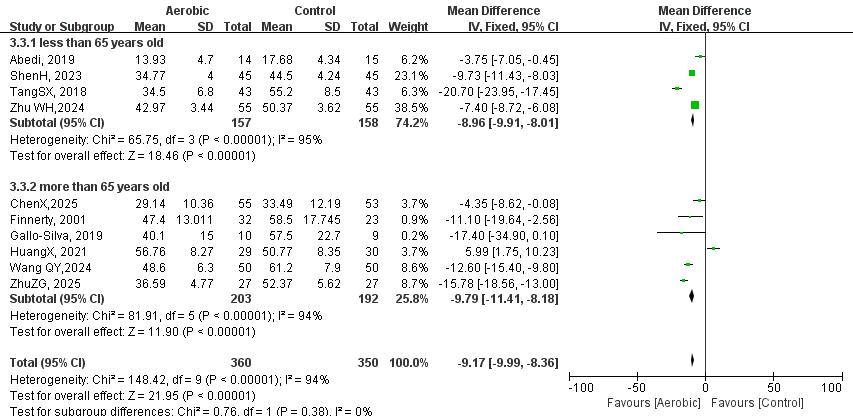
**

**Figure. S3** Subgroup analysis based on average age of SGRQ

**2.1.4 FEV1% pred**

**
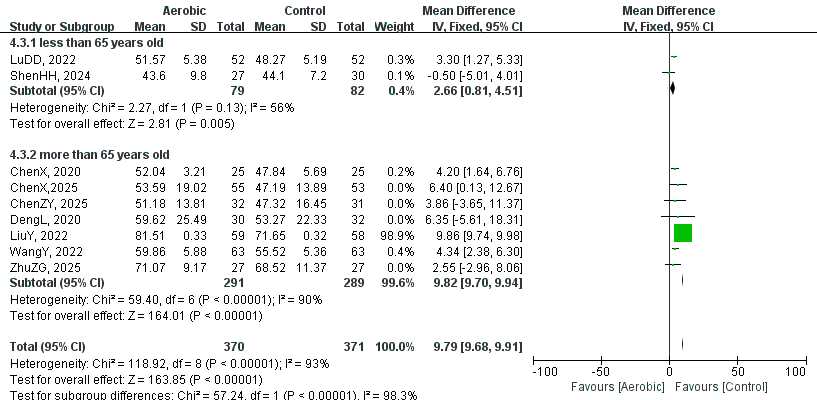
**

**Figure. S4** Subgroup analysis based on average age of FEV1% pred

**2.1.5 FEV1/FVC%**

**
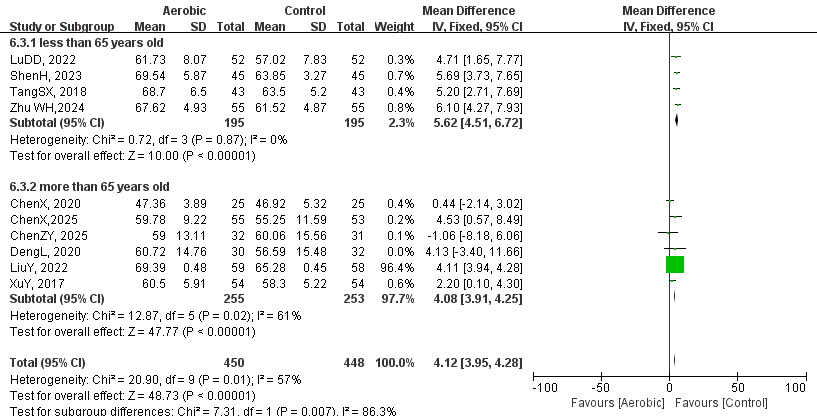
**

**Figure. S5** Subgroup analysis based on average age of FEV1/FVC%.

**2.2 Subgroup analysis based on different interventions of the aerobic group**

**2.2.1 6MWT**

**
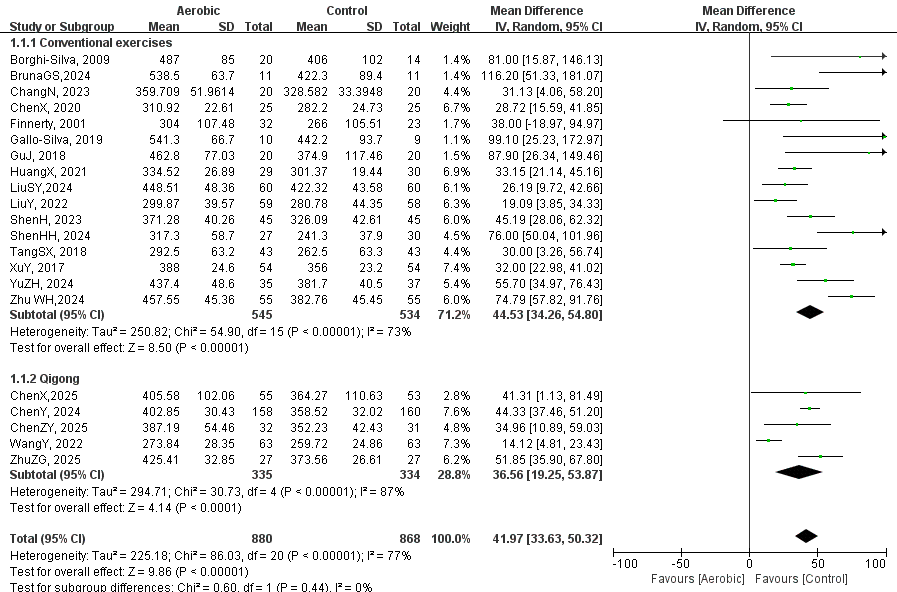
**

**Figure. S6** Subgroup analysis based on different interventions of the aerobic group of 6MWT.

**2.2.2 CAT**

**
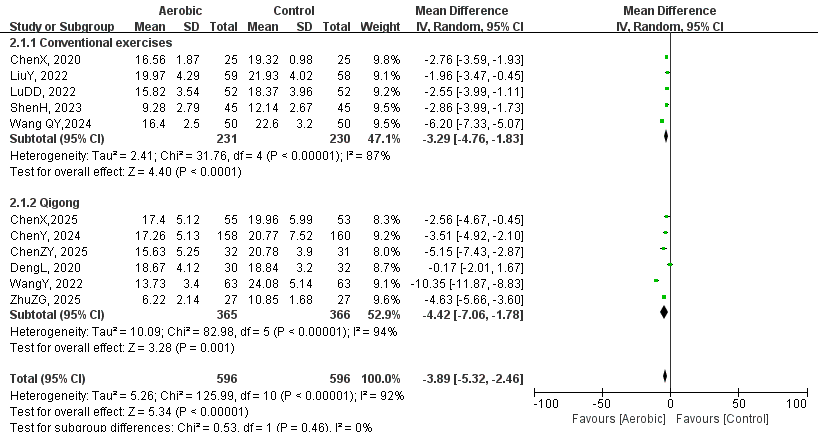
**

**Figure. S7** Subgroup analysis based on different interventions of the aerobic group of CAT.

**2.2.3 SGRQ**

**
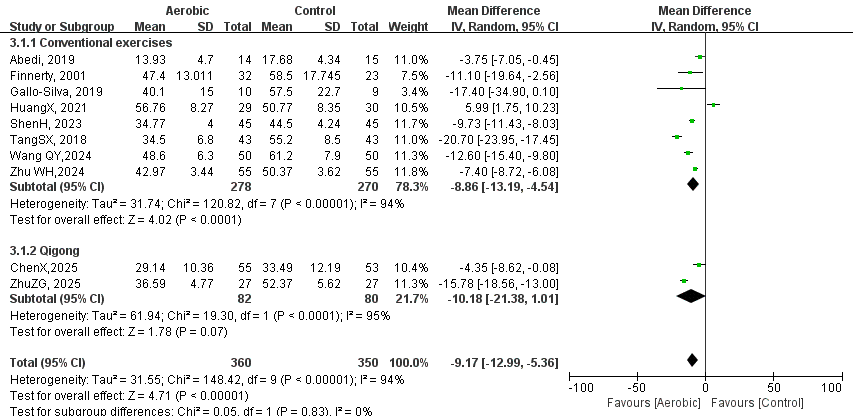
**

**Figure. S8** Subgroup analysis based on different interventions of the aerobic group of SGRQ.

**2.2.4 FEV1% pred**

**
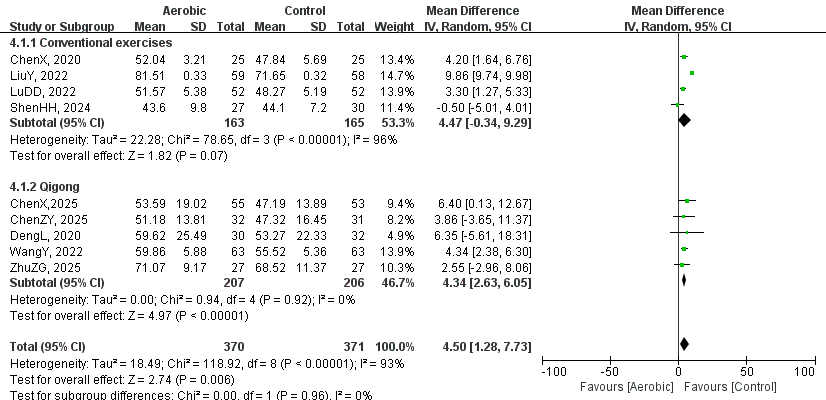
**

**Figure. S9** Subgroup analysis based on different interventions of the aerobic group of FEV1% pred.

**2.2.5 FEV1/FVC%**

**
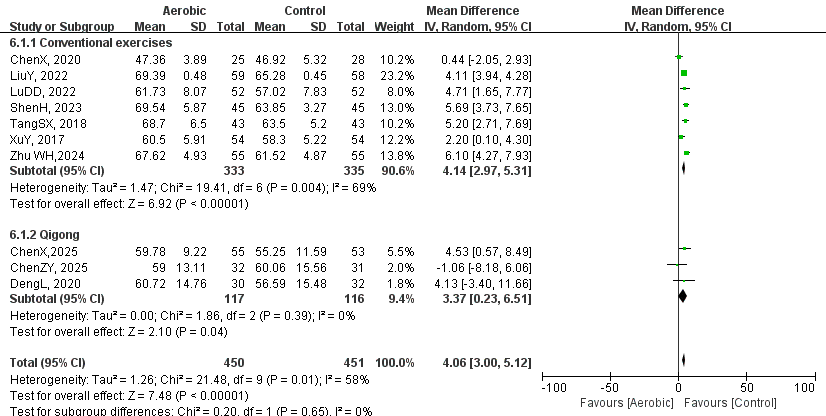
**

**Figure. S10** Subgroup analysis based on different interventions of the aerobic group of FEV1/FVC%.

**Appendix 3: Meta Regression**

| Outcomes | Characteristics (covariates)  (n = 21) | Coefficient | 95% CI | p value |
| --- | --- | --- | --- | --- |
| 1. min walk test   (6MWT) | Nation | 40.57 | [4.25, 76.90] | 0.029 |
| Intervention time | -12.15 | [-39.14, 14.83] | 0.377 |
| Sample size | -14.84 | [-33.80, 4.11] | 0.125 |

**Table. S1** Meta-regression analysis for 6-min walk test (6MWT)

| Outcomes | Characteristics (covariates)  (n = 10) | Coefficient | 95% CI | p value |
| --- | --- | --- | --- | --- |
| St. George’s Respiratory Questionnaire  (SGRQ) | Nation | 0.22 | [-11.41, 11.85] | 0.970 |
| Intervention Time | -0.32 | [-12.70, 12.06] | 0.960 |
| Sample size | -3.75 | [-13.53, 6.03] | 0.452 |

**Table. S2** Meta-regression analysis for St. George’s Respiratory Questionnaire (SGRQ)

**Appendix 4: Sensitivity analysis**

**4.1 6MWT**


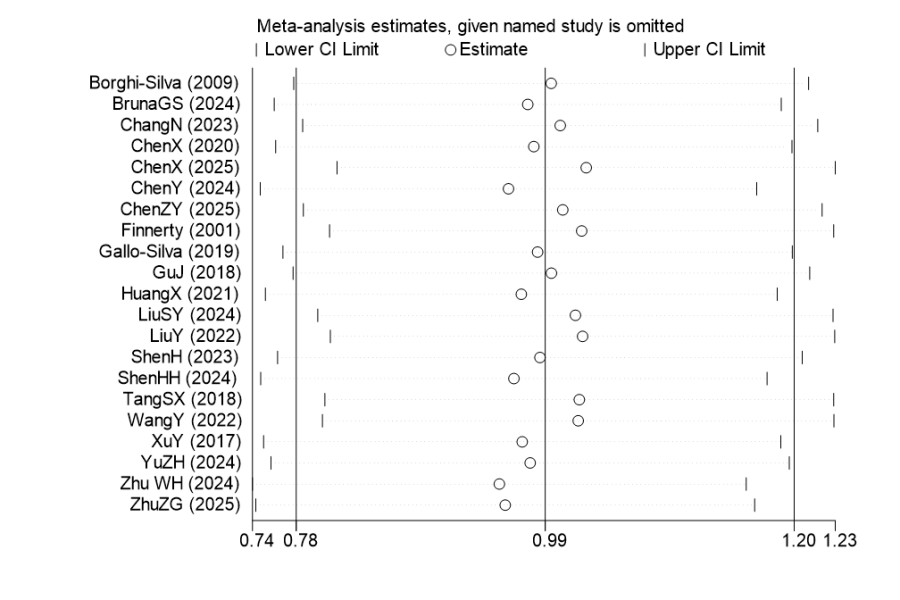


**Figure. S11** Sensitivity analysis of 6MWT

**4.2 CAT**


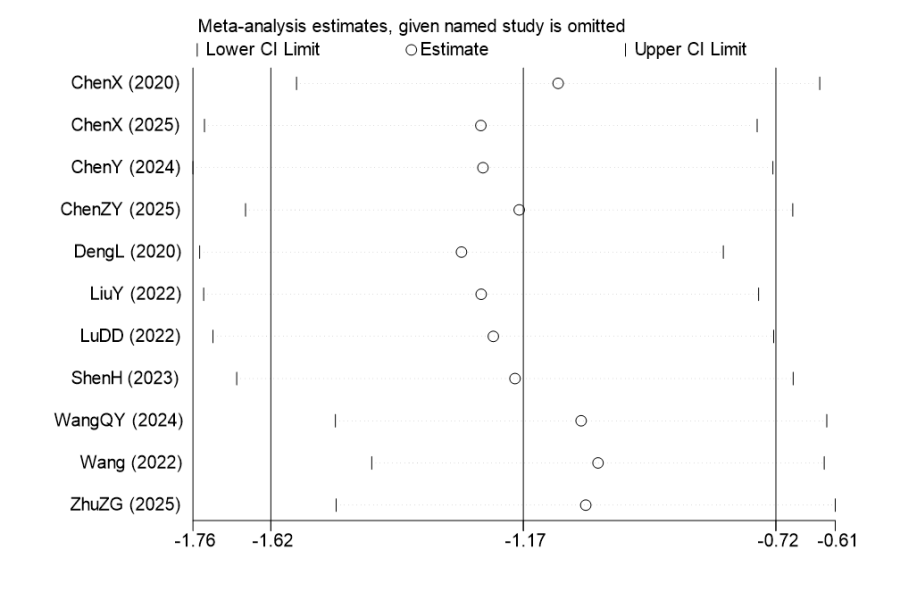


**Figure. S12** Sensitivity analysis of CAT

**4.3 SGRQ**


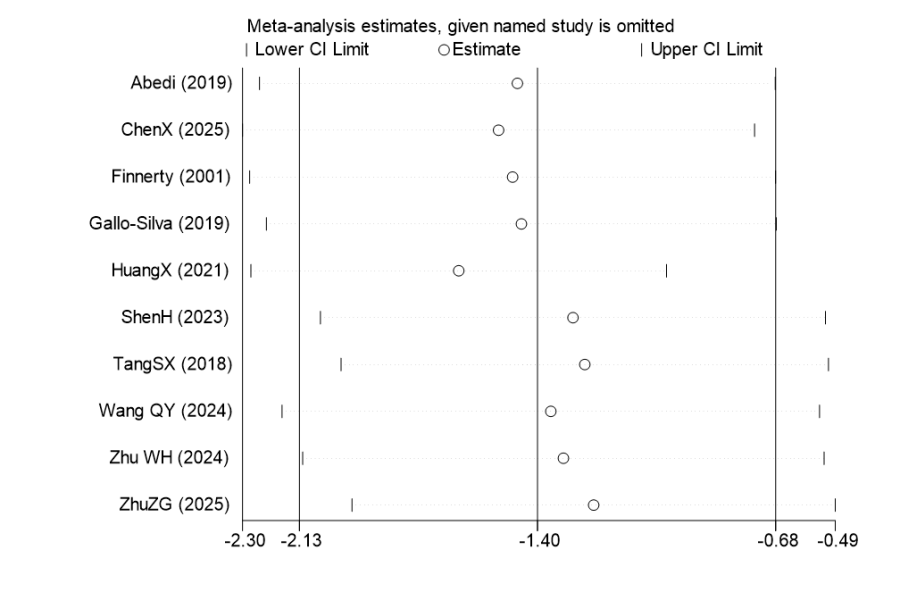


**Figure. S13** Sensitivity analysis of SGRQ

**4.4 FEV1% pred**


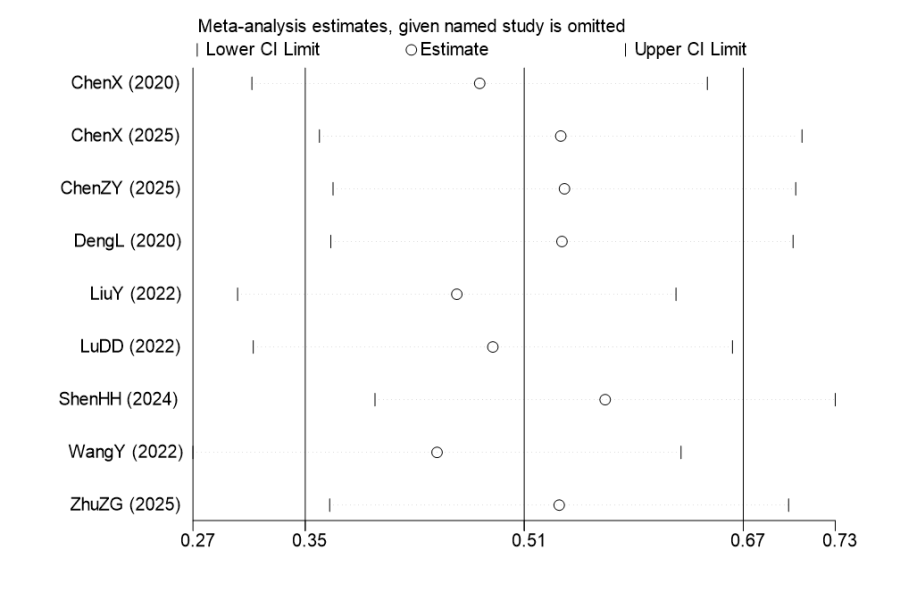


**Figure. S14** Sensitivity analysis of FEV1% pred

**4.5 FEV1/FVC%**


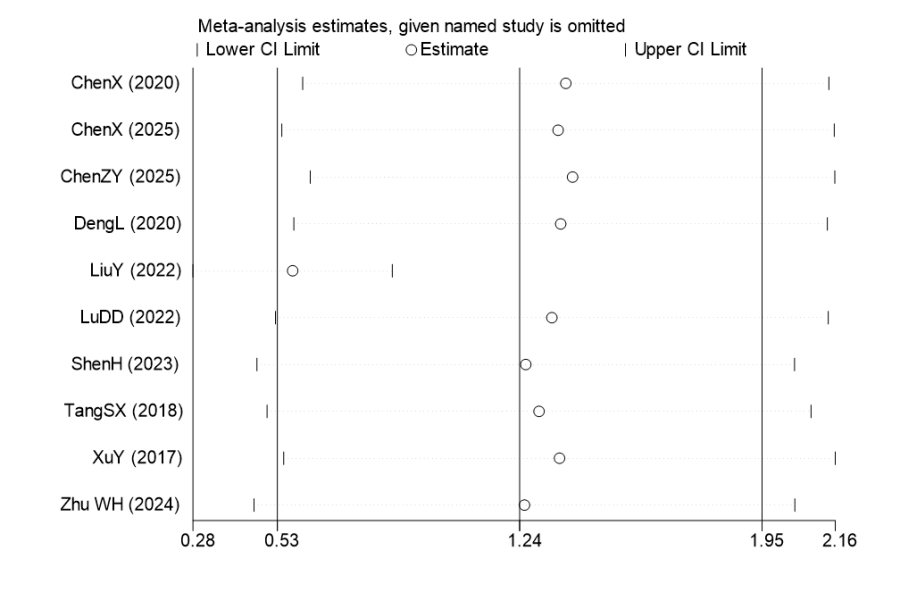


**Figure. S15** Sensitivity analysis of FEV1/FVC%

**Appendix 5: Publication bias**

**5.1 the Egger's test result of 6MWT**

**
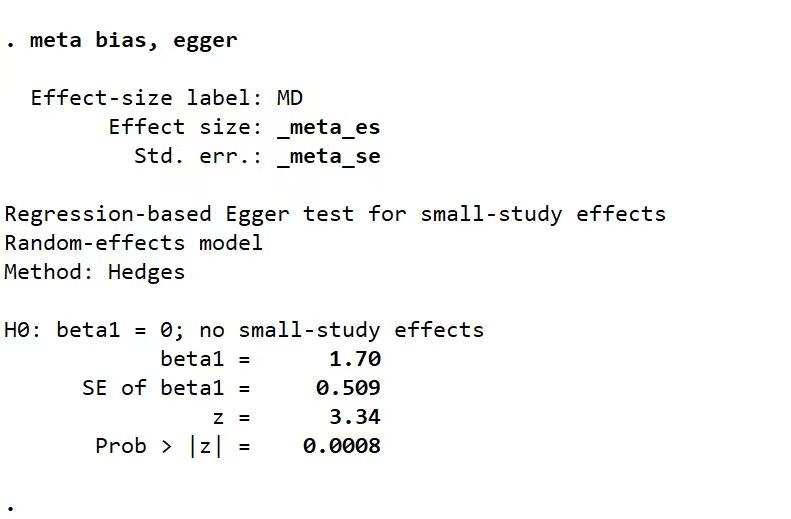
**

**Figure. S16** the Egger's test result of 6MWT

**5.2 the funnel plot of 6MWT**

**
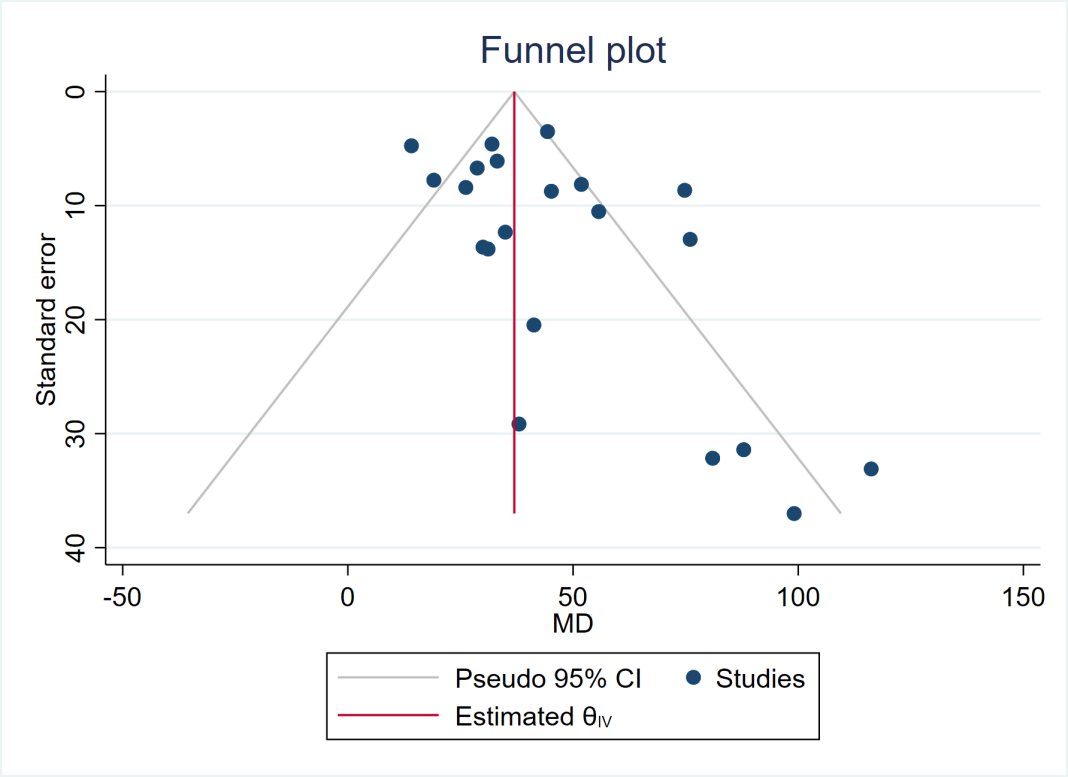
**

**Figure. S17** the funnel plot of 6MWT

**5.3 6MWT's the trim-and-fill method funnel chart**

**
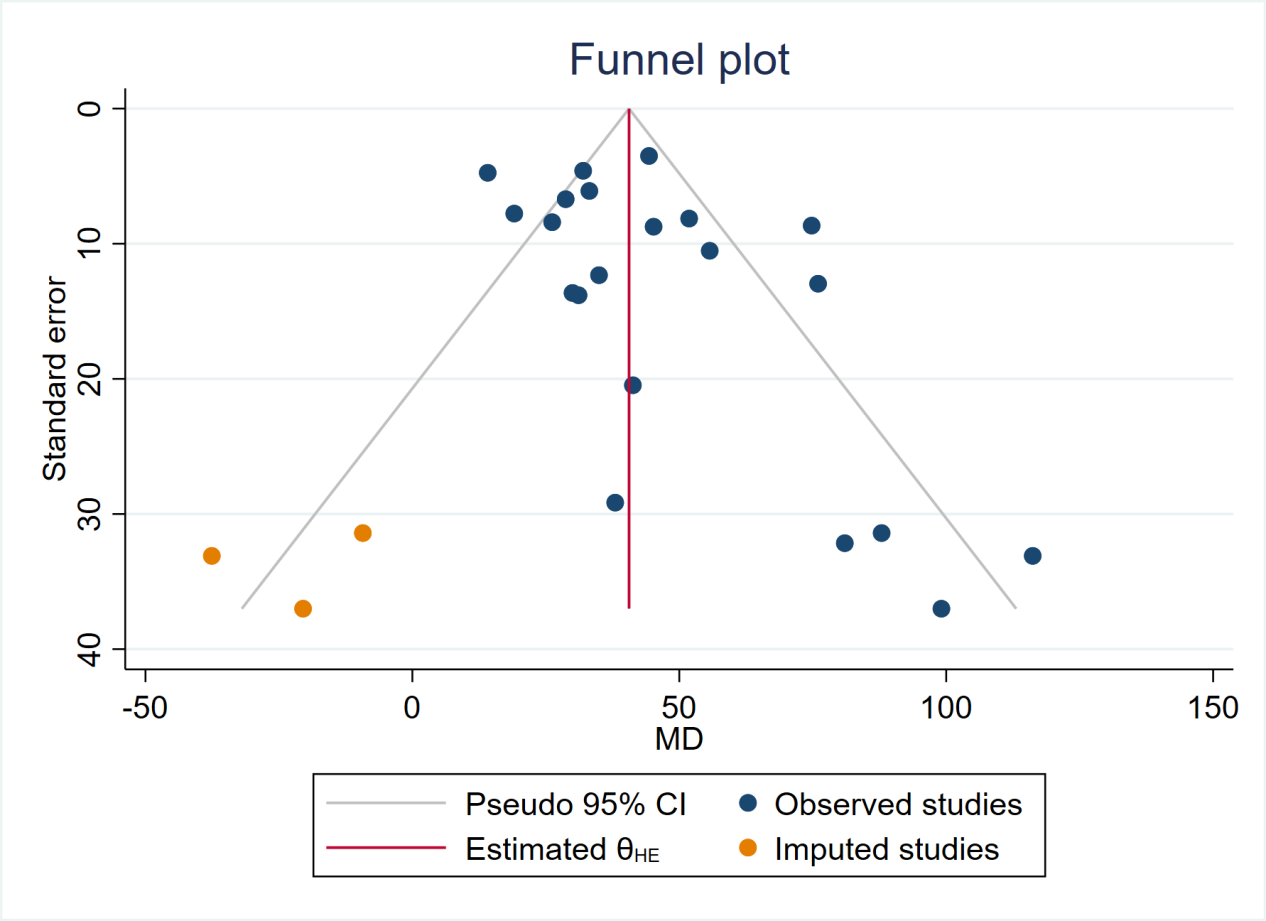
**

**Figure. S18** 6MWT's the trim-and-fill method funnel chart
